# Supplementary material for: Integrated multi-omics analyses identify key anti-viral host factors and pathways controlling SARS-CoV-2 infection
Source: Research Square preprint supplement (doi:10.21203/rs.3.rs-1910932/v1), 2022-08-15
Supplement: Supplementary file 1 [file 8aa38f6493e9b4ff50257e30.xlsx]

## Sheet: Extended Data Table 5
	protospacer sequences of gRNAs
NC	5'-CCGCAATATATGCGGTAAG
ATP6V0D1	5'-TATGAACAGGTCAAGAACG
DPAGT1	5'-GTGTACTGTCACCAGCTGG
CUL1	5'-AGTTCCAAGAACCCAGAGG
SRSF7	5'-GGATCTTCGAATTCCACAA
DAZAP2	5'-AAGCTGAGCAGCATTGGGA
CAB39	5'-TAATAGGGCAAAAAAGACG
VPS4A	5'-CGGCTGTACCAGCATGCGG
KLF5	5'-CTGGAATTATAGGAACTGG
POLE	5'-GGCAGTCATAATCTCAAGG
ZGRF1	5'-CAACAGTAGGAAACAAAGG
NOC2L	5'-CTGAAGAGGACGACACCGA
SMC3	5'-GATGCAAGAGATAAAATGG
MED12	5'-AGCTGAGGCCAAAAACCAG
VTA1	5'-GACAAGCGAGACCCTGTGG
UFD1L	5'-CTGGATGGAAAGAAGAAAG
RBBP6	5'-AGGGATAAACCAAAAGCAA
PDCD10	5'-TATCAATACCAGAACCGCA
AP2B1	5'-GATATCAATGCCCAAATGG
P4HB	5'-TCTGCCTTCAGCTTCCCAG
WAPAL	5'-AACCATGTAGGCAAAGCAG
CHMP6	5'-GCAGCAACTGAAGCAGCAG
PDCD6IP	5'-CTGAAAAAGACCTCAGAGG
SLC44A1	5'-AGAGGCAGACGATGATCAG
ARNT	5'-GGGGAACCTCACTTCGTGG
RFWD2	5'-GCAAGAAGAAATAAGAGAG
SNF8	5'-GGCCAAGTATAAGGAGCGA
TADA1	5'-GCCAAGAAGAACTTAAGCG
NEK7	5'-AATAGTGATCTGAAGGAAG
PAXIP1	5'-TAAAGTGTACCTTAAAGAG
SERINC3	5'-CAGCTGAATGAGGATGAAG
Flanking sequences for gRNA construction
Forward	5'-CACCGXXXXXXXXXXXXXXXXXXX (X:19nt protospacer sequence)
Reverse	5'-AAACXXXXXXXXXXXXXXXXXXXC (X:19nt reverse complement protospacer sequence)
