# Supplementary material for: Integrated multi-omics analyses identify key anti-viral host factors and pathways controlling SARS-CoV-2 infection
Source: Research Square preprint supplement (doi:10.21203/rs.3.rs-1910932/v1), 2022-08-15
Supplement: Supplementary file 2 [file 99d029e198a9022b8bde999c.xlsx]

## Sheet: Sheet1
Validated Twice	Validated Once	Not Validated
20/30 (66.7%)	5/30 (16.7%)	5/30 (16.7%)
ATP6V0D1	ARNT	AP2B1
CAB39	NEK7	NOC2L
CHMP6	RFWD2	POLE
CUL1	SNF8	RBBP6
DAZAP2	VPS4A	ZGRF1
DPAGT1
KLF5
MED12
P4HB
PAXIP1
PDCD10
PDCD6IP
SERINC3
SLC44A1
SMC3
SRSF7
TADA1
UFD1L
VTA1
WAPAL
