# Supplementary material for: Integrated multi-omics analyses identify key anti-viral host factors and pathways controlling SARS-CoV-2 infection
Source: Research Square preprint supplement (doi:10.21203/rs.3.rs-1910932/v1), 2022-08-15
Supplement: Supplementary file 3 [file a840774ea452b130a6e2b773.xlsx]

## Sheet: Extended Data Table 6
Primer for qPCR	Sequence
ATP6V0D1-R	5'-GCATCACCTCTGACGGTGTC
ATP6V0D1-F	5'-TAGGCATGGTTCCTCATGTGG
DPAGT1-R	5'-GCGGATGATGTACTGAATCTGC
DPAGT1-F	5'-ACAATGGTCGTGTTGCCAAAG
DAZAP2-F	5'-AGCAAAGGTCAATATCCAACACA
DAZAP2-R	5'-GCCTGAGGAAGATGCAAGGTC
VTA1-F	5'-CTCCCCGCACAGTTCAAGAG
VTA1-R	5'-AACGACAGTAATAAGCCACCAC
KLF5-F	5'-CCTGGTCCAGACAAGATGTGA
KLF5-R	5'-TAAACTTTTGTGCAACCAGGGTAA
ACTB-F	5'-CTCACCATGGATGATGATATCGC
ACTB-R	5'-AGGAATCCTTCTGACCCATGC
CoV19-N2-F	5'-TTACAAACATTGGCCGCAAA
CoV19-N2-R	5'-GCGCGACATTCCGAAGAA
