# Supplementary material for: Integrated multi-omics analyses identify key anti-viral host factors and pathways controlling SARS-CoV-2 infection
Source: Research Square preprint supplement (doi:10.21203/rs.3.rs-1910932/v1), 2022-08-15
Supplement: Supplementary file 4 [file dc144f18b81ddc2ac6aff8f4.xlsx]

## Sheet: Sheet1
Dataset names	Screen Method	Cell Type	Virus Type	MOI (temperature)	Post-Infection Time	Criteria
PMID:33382968_Huh-7.5	Genome-wide loss-of-function screen by CRISPR knockout	Huh-7.5	SARS-CoV-2	1: 0.01 (33 degree); 2: 0.1 (37 degree)	5d	At either condition, Enriched (proviral): FDR<0.05 and z score > 0; Depleted (anti-viral): FDR<0.05 and z score < 0
PMID:33147445_A549-ACE2	Genome-wide loss-of-function screen by CRISPR knockout	A549-ACE2	SARS-CoV-2	1: 0.3 (37 degree); 2: 0.01 (37 degree)	6d	At either condition, Enriched (proviral): Gene rank Top 100 based on RRA at either conditions for enrichment analysis; Depleted (anti-viral): N/A.
PMID:33574281_A549-ACE2	Genome-wide loss-of-function screen by CRISPR knockout	A549-ACE2	Sdel strain of SARS-CoV-2	3 (37 degree)	almost all cells were killed after 2 rounds of infection	Enriched (proviral): Gene rank top 100 based on MAGeCK score for enrichment analysis; Depleted (anti-viral): N/A.
PMID:33333024_Huh-7.5.1	Genome-wide loss-of-function screen by CRISPR knockout	Huh7.5.1-ACE2-IRES-TMPRSS2	SARS-CoV-2	0.01 (37 degree)	12d	Enriched (proviral): Gene rank top 100 based on MAGeCK score for enrichment analysis; Depleted (anti-viral): N/A.
PMID:33686287_Huh-7.5	Genome-wide loss-of-function screen by CRISPR knockout	Huh-7.5	SARS-CoV-2	1: 0.2 (37 degree); 2: 2.5 (37 degree)	1: 14 days; 2: 41 days	At either condition, Enriched (proviral): LFC>0 and p<0.05; Depleted (anti-viral): N/A.
PMID:34075371_Caco 2_LOF	Genome-wide loss-of-function screen by CRISPR knockout	Caco-2-ACE2	SARS-CoV-2	0.005 (37 degree)	18-27d	Enriched (proviral): Gene rank top 100 based on z score for enrichment analysis; Depleted (anti-viral): N/A.
PMID:34075371_Calu 3_LOF	Genome-wide loss-of-function screen by CRISPR knockout	Calu-3	SARS-CoV-2	0.005 (37 degree)	30-34d	Enriched (proviral): Gene rank top 100 based on z score for enrichment analysis; Depleted (anti-viral): N/A.
PMID:34075371_Calu 3_GOF	Genome-wide gain-of-function screen by CRISPR activation	Calu-3	SARS-CoV-2	0.005 (37 degree)	30-34d	Enriched (proviral): Gene rank top 100 based on z score for enrichment analysis; Depleted (anti-viral): Gene rank top 100 based on z score for depletion analysis
PMID:35086559_HEK293T	Genome-wide loss-of-function screens by CRISPR knockout	HEK293T-hACE2	SARS-CoV-2	1: 0.01 -> 0.01 (37 degree); 2:0.01 -> 0.1 (37 degree); 3:0.3 -> 0.03 (37 degree).	13 days post initial infection, cells were reinfected at indicated MOI and collected after 7 days reinfection.	At any condition, Enriched (proviral): LFC>0 and FDR<0.25; Depleted (anti-viral): LFC<0 and FDR<0.25
PMID:35469023_Calu 3	Genome-wide loss-of-function screens by CRISPR knockout	Calu-3	SARS-CoV-2 (WT), a and b stains	0.02–0.04 (37 degree)	7-9 days	Overall results from all screens, Enriched (proviral): -log10(MAGeCK enrichment score)>3 and -log10(FDR)>0.15; Depleted (anti-viral): -log10(MAGeCK depletion score)>3 and -log10(FDR)>0.15.
Biering et.al_Calu 3_LOF	Genome-wide, bidirectional loss-of-function screen by CRISPR knockout	Calu-3	SARS-CoV-2	0.05 (37 degree)	5d	Enriched (proviral): Gene rank Top 100 based on MAGeCK score for enrichment analysis; Depleted (anti-viral): N/A.
Biering et.al_Calu 3_GOF	Genome-wide, bidirectional gain-of-function screen by CRISPR activation	Calu-3	SARS-CoV-2	0.05 (37 degree)	5d	Enriched (proviral): Gene rank Top 100 based on MAGeCK score for depletion analysis; Depleted (anti-viral): Gene rank Top 100 based on MAGeCK score for enrichment analysis.
