# Supplementary material for: Integrated multi-omics analyses identify key anti-viral host factors and pathways controlling SARS-CoV-2 infection
Source: Research Square preprint supplement (doi:10.21203/rs.3.rs-1910932/v1), 2022-08-15
Supplement: Supplementary file [file 293434606d41192a4de00f60.pdf]

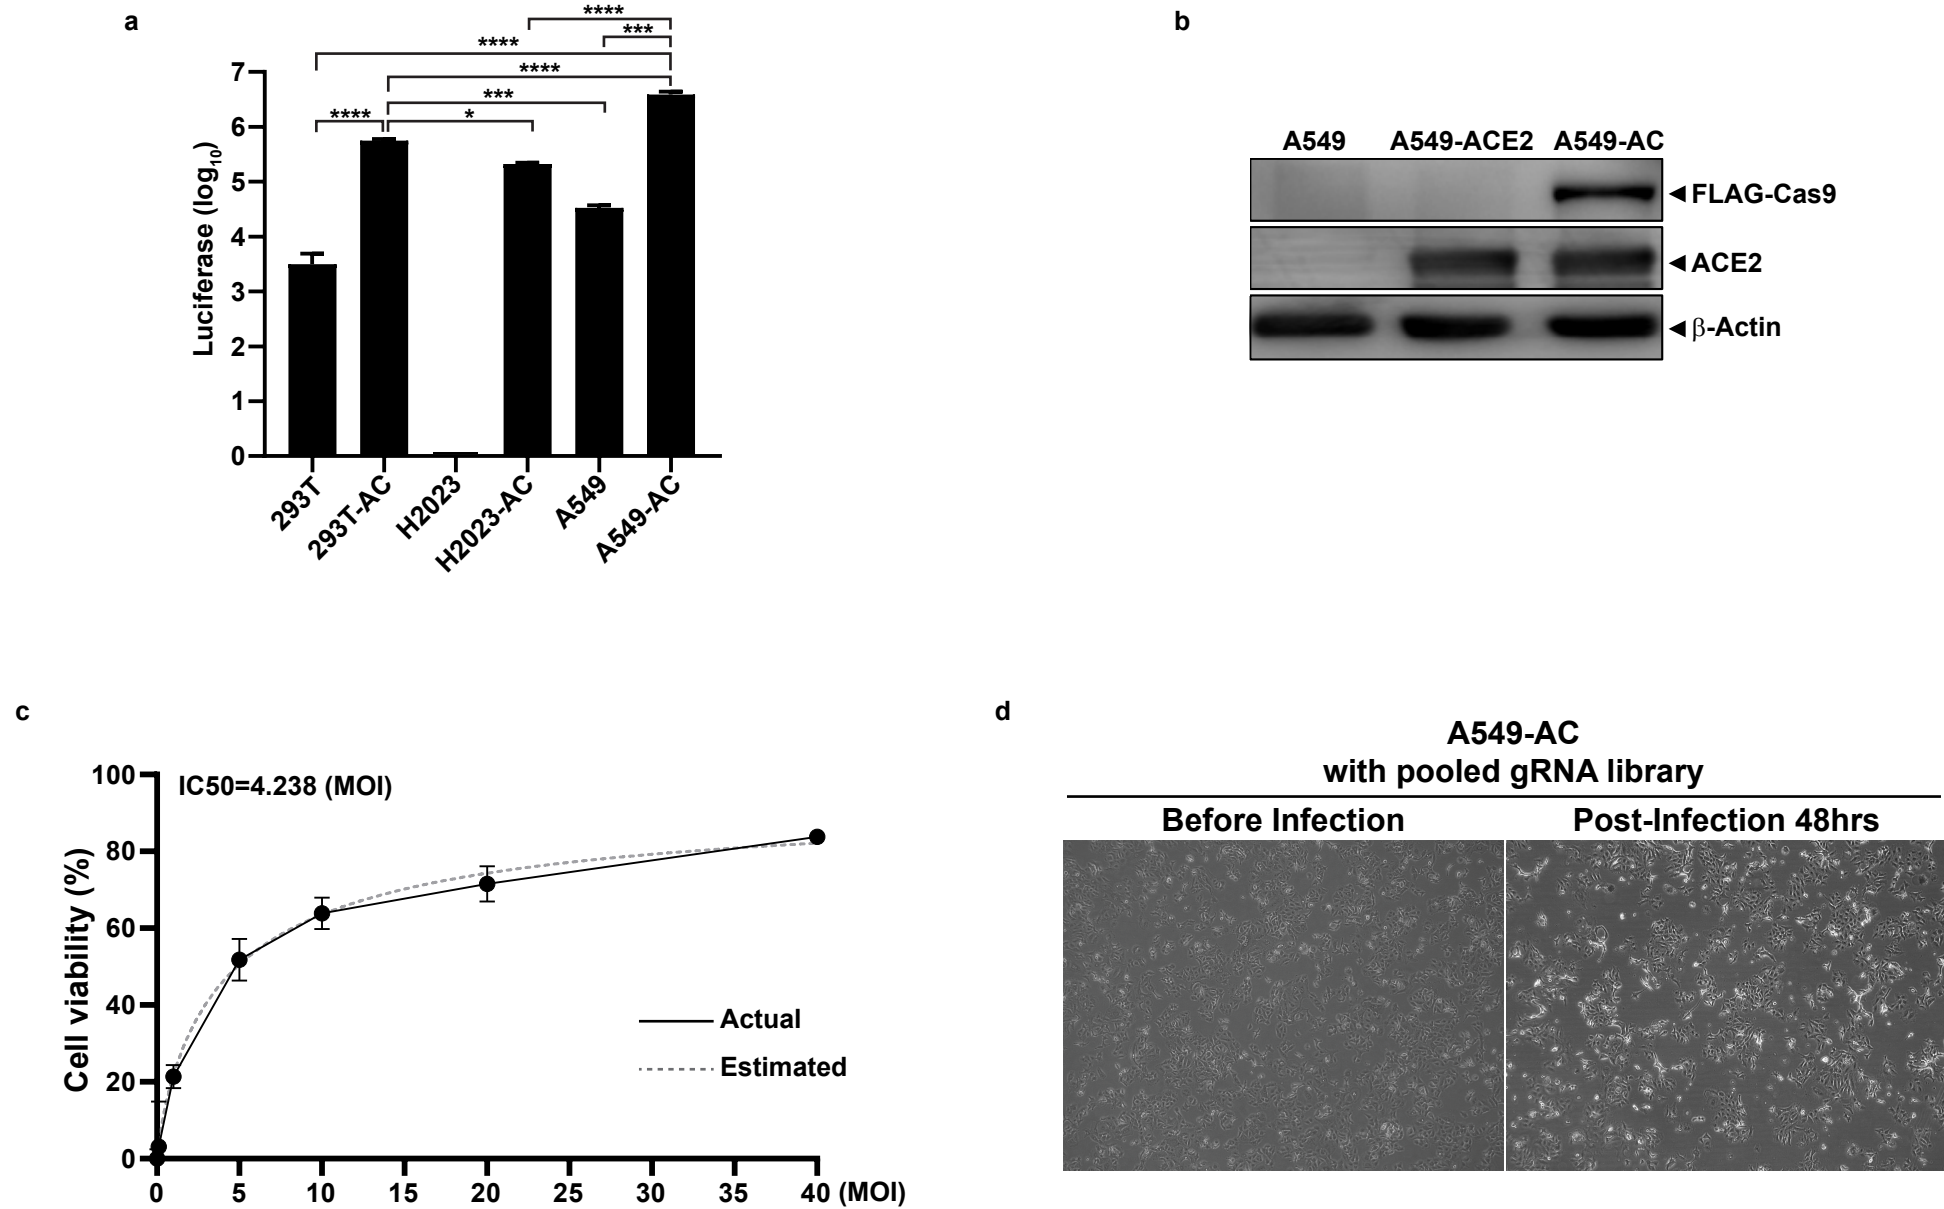

**Extended Data Figure 1. Establishment of genome-wide CRISPR/Cas9 dropout screens for SARS-CoV-2 infection** (a) Evaluation of permissiveness of human epithelial cell lines for SARS-CoV-2 infection. Human epithelial cells were infected with recombinant SARS-CoV-2-Nluc at MOI=0.2 and luciferase signals were measured at 24-h post-infection. (b) Expression of ACE2 and Cas9 expression in A549-AC cells. Anti-human ACE2 and anti-flag antibodies were used to determine the level of ACE and FLAG-tagged Cas9, respectively. (c) Dose effect of SARS-CoV-2 on CPE. A549-AC cells were infected with different MOIs (ranging from 0.1 to 40) of recombinant SARS-CoV-2. 48 hours after infection, the viabilities of infected cells were measured. A four-parameter nonlinear regression method was used to generate the estimated dose-response curve and to calculate the MOI for 50% of cell lysis. (d) Representative images of cells before and after viral infection. Typical bright field images of pooled A549-AC cells with the gRNA library were illustrated before (left panel) and after (right panel) SARS-CoV-2 infection. Samples were triplicated in experiments. The comparisons with statistical significance were indicated. \* $p < 0.05$ ; \*\*\* $p < 0.001$ ; \*\*\*\* $p < 0.0001$ .

a

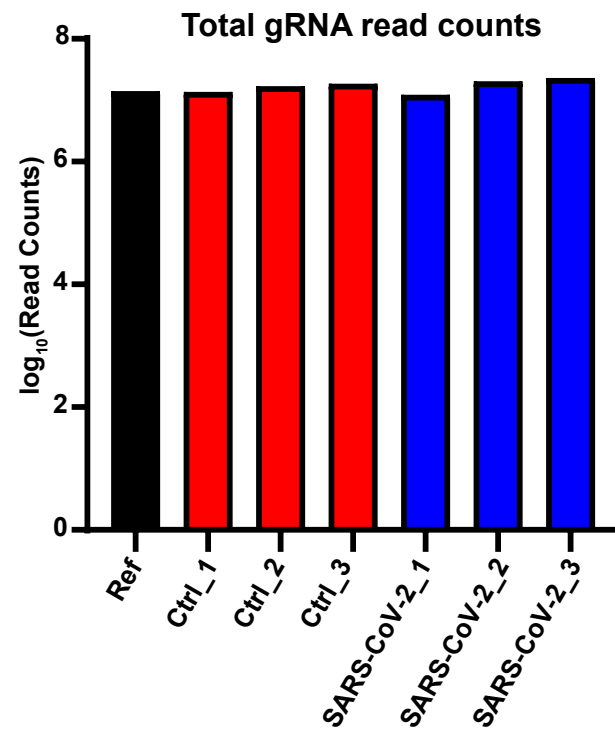

b

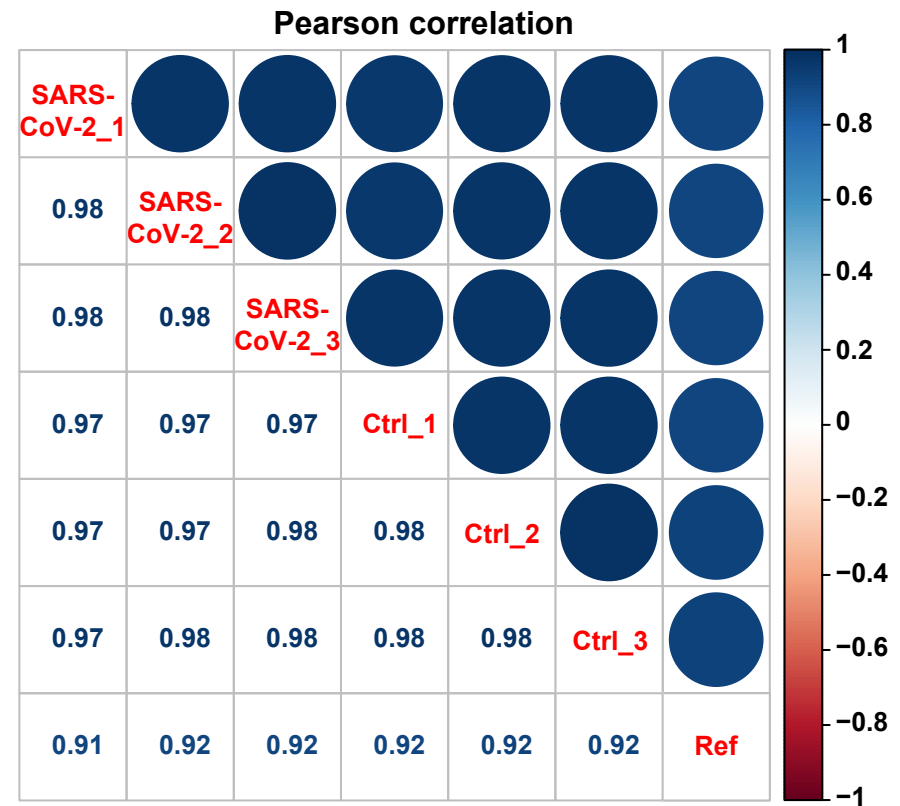

c

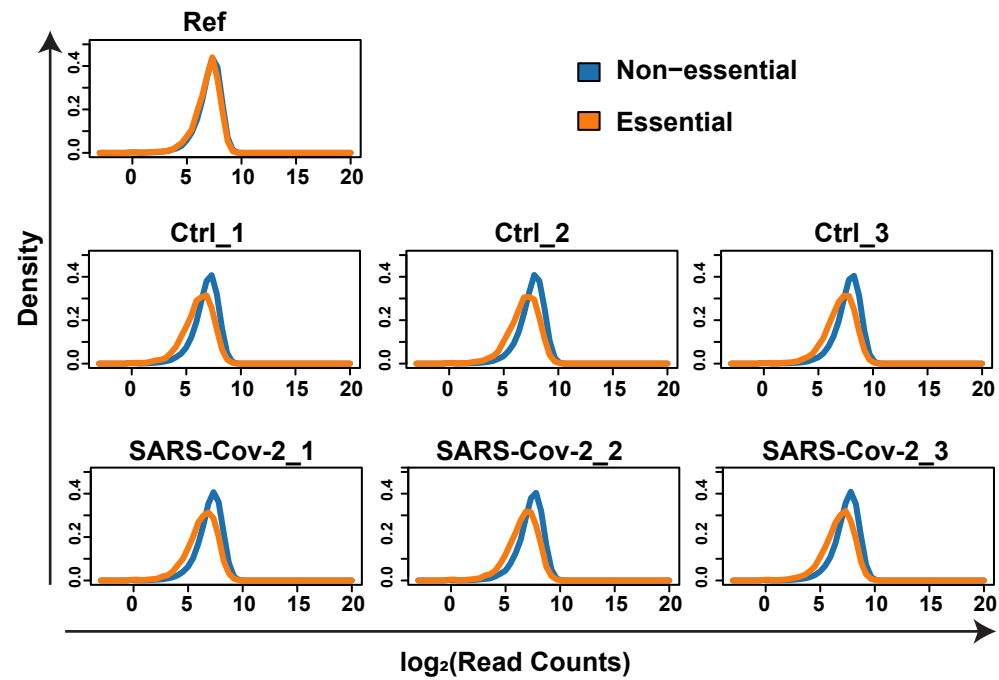

**Extended Data Figure 2. Quality evaluation of results from the genome-wide CRISPR dropout screen.** (a) Raw read counts of total gRNAs in samples collected from the genome-wide CRISPR dropout screen. (b) Correlations of gRNA frequencies across experimental samples. Pairwise Pearson correlation analyses were performed between two distinct samples. (c) Distribution of gRNAs targeting essential and non-essential genes in the reference sample (upper panel), the control samples (middle panel) and the SARS-CoV-2 infected samples (bottom panel).



A

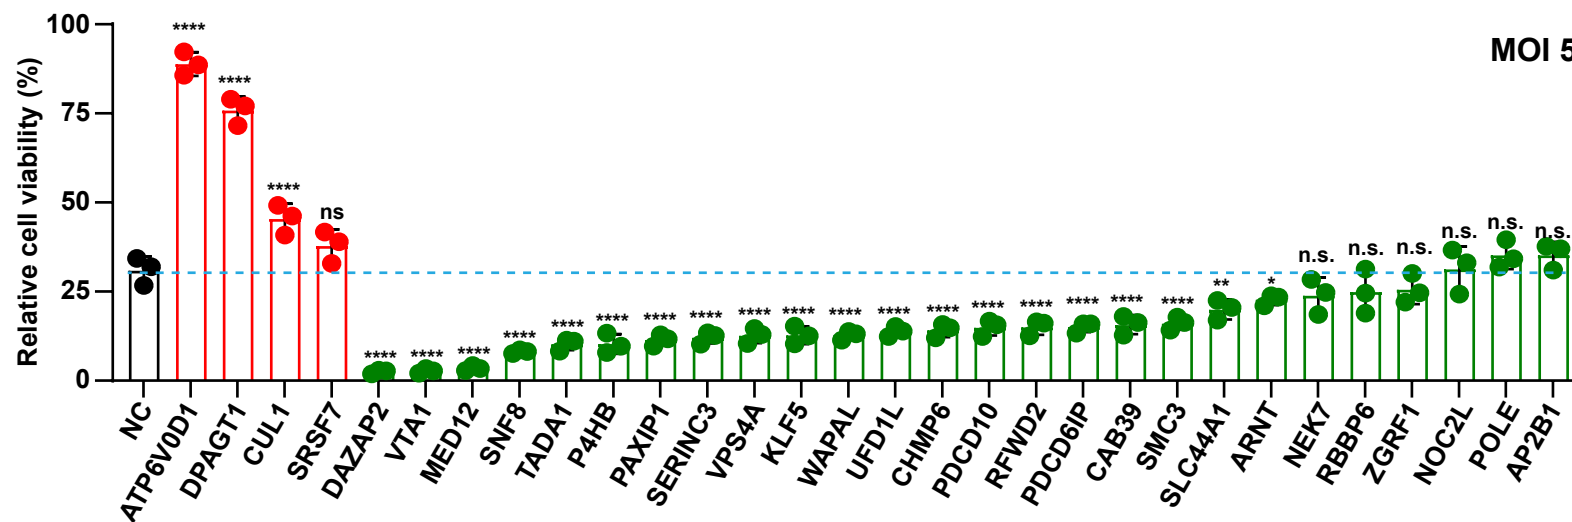

B

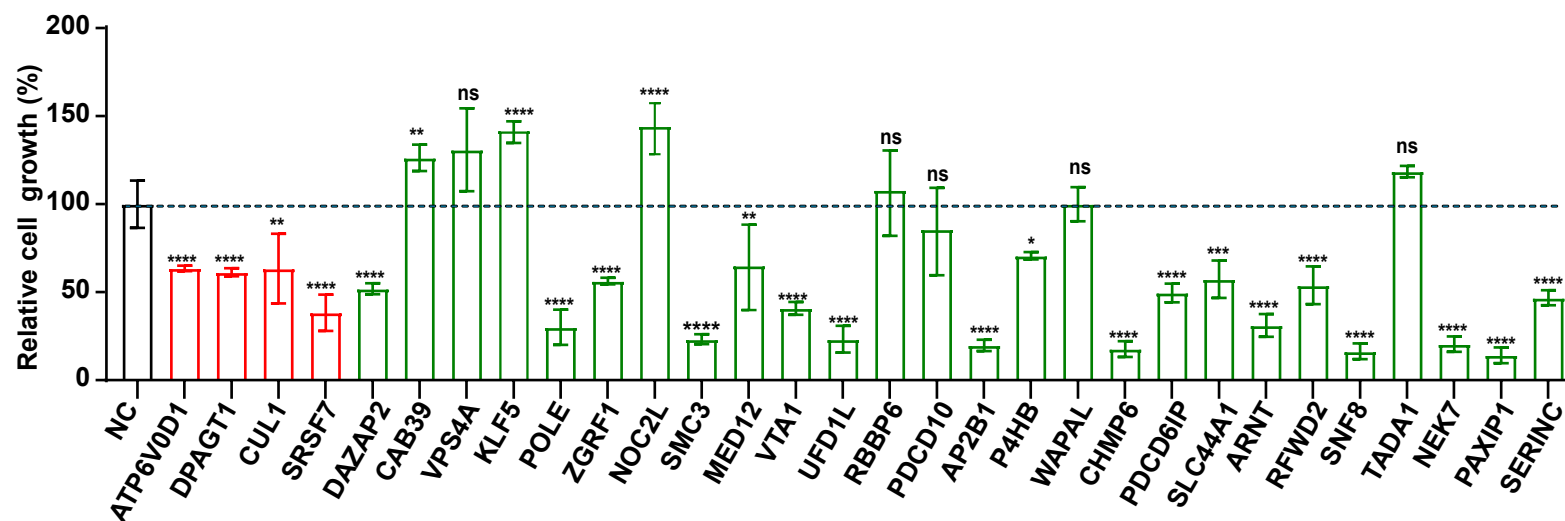

**Extended Data Fig. 3. Phenotypes of knocking out putative host factors in lung epithelial cells.** (a) Effects of knocking out putative host factors on CPE at the high MOI condition. A series of A549-AC cell lines with related gRNA expression were infected with the recombinant SARS-CoV-2 at MOI=5 and cell viability was measured at 48 hours post-infection. (b) Effects of knocking out putative host factors on *in vitro* growth. Equal numbers of genetically modified A549-AC cells were seeded and cultured for 48 hours *in vitro*. The relative changes in cell numbers of A549-AC cells with gene-specific KD were calculated by normalizing with the number of A549-AC cells expressing non-targeting gRNA. Statistical significance between the gRNAs and NC was determined by one-way ANOVA with repeated measurements. \* $p < 0.05$ ; \*\* $p < 0.01$ ; \*\*\* $p < 0.001$ ; \*\*\*\* $p < 0.0001$ . n.s., not significant.

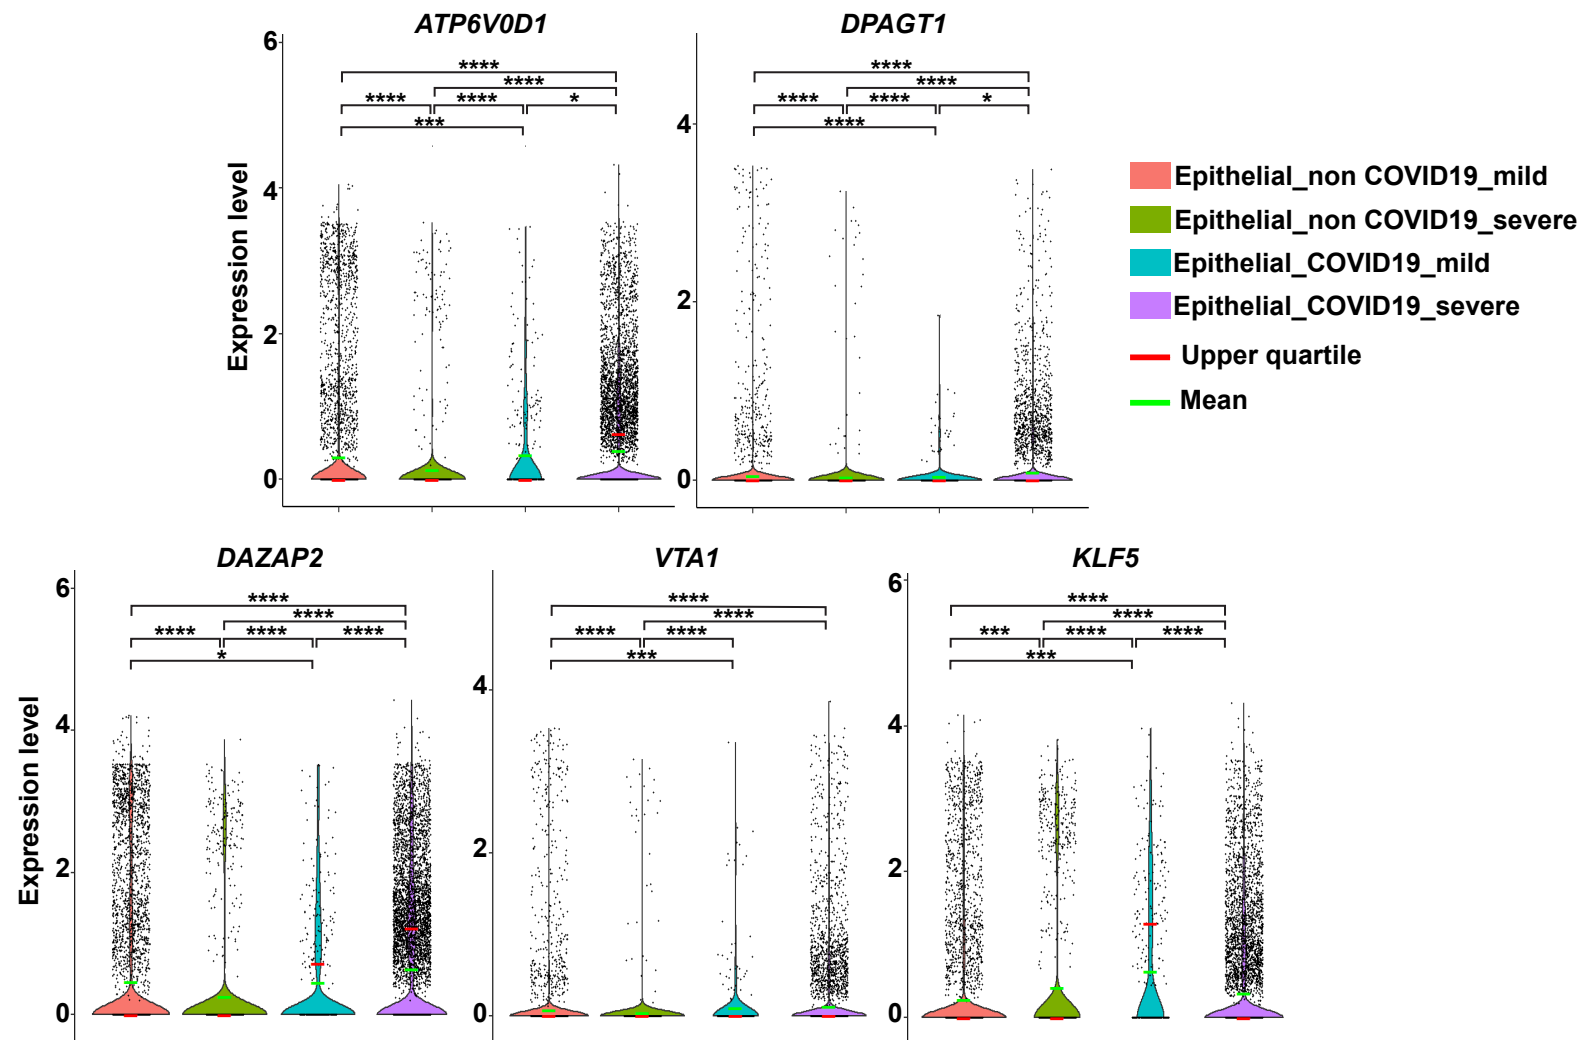

**Extended Data Fig. 4. Comparisons of expression levels of identified host factors in lung epithelial cells from pneumonia patients.** The mRNA expression levels of two pro-viral factors (ATP6V0D1 and DPAGT1) and three anti-viral factors (DAZAP2, VTA1, and KLF5) in epithelial cells in bronchoalveolar lavage fluids were extracted from published single cell RNA-seq datasets of pneumonia patients. Patients were stratified by their diagnosis (COVID-19 and non-COVID-19) and severity (mild and severe). Log transformed read counts to each host factor in lung epithelial cells from different patient groups were illustrated. The comparisons with statistical significance were indicated. \* $p < 0.05$ ; \*\*\* $p < 0.001$ ; \*\*\*\* $p < 0.0001$ .

a

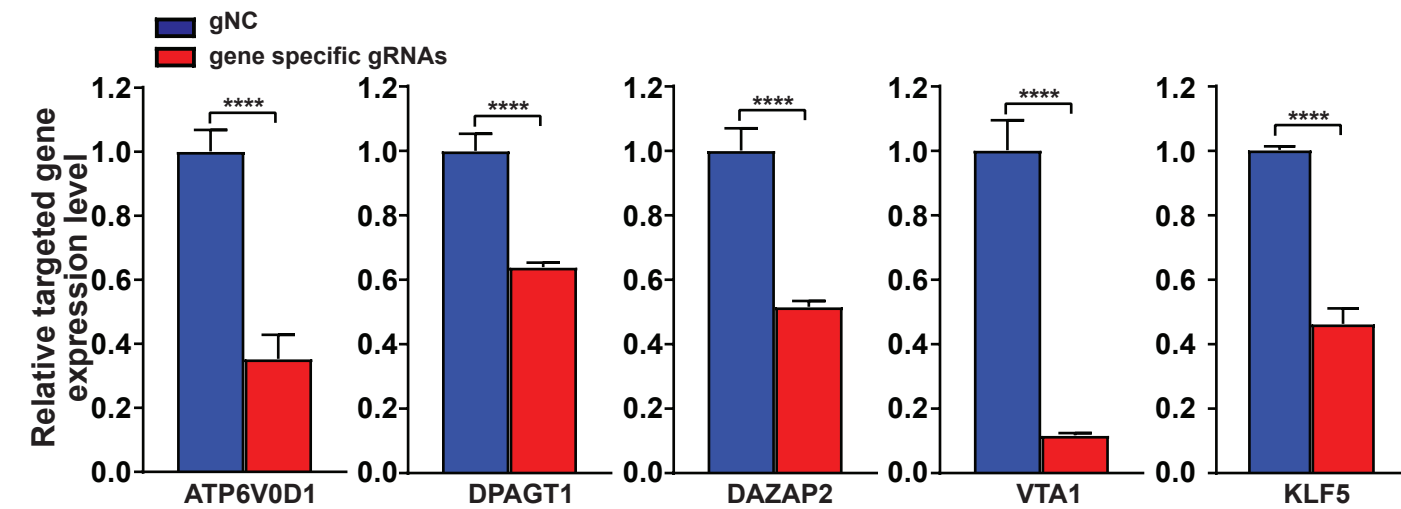

b

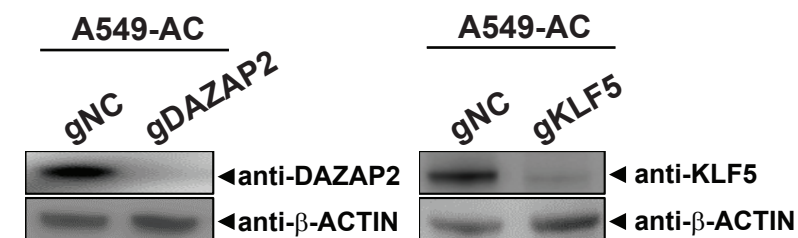

c

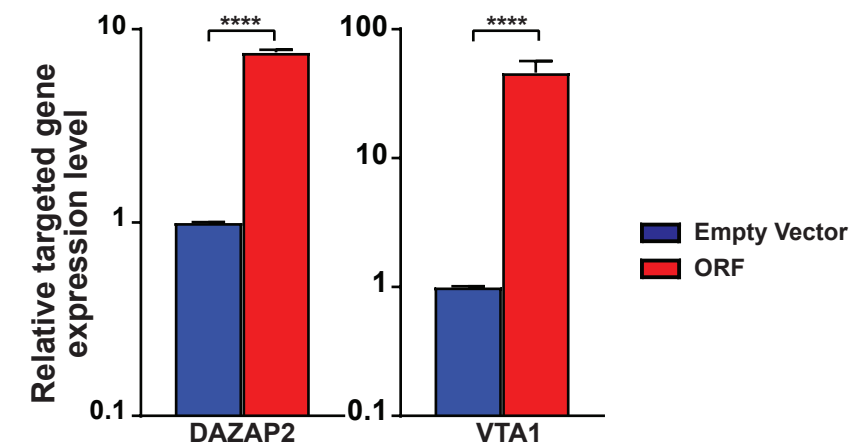

d

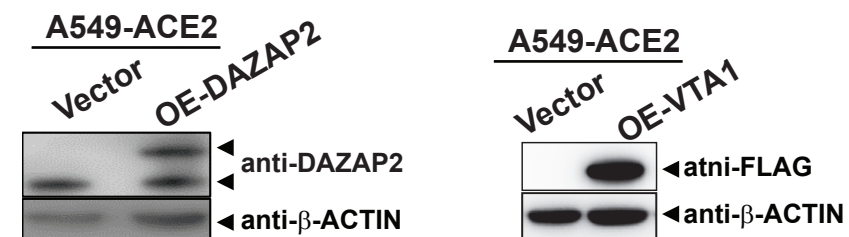

**Extended Data Fig. 5. Successful gene-specific perturbations in A549-AC cells.** (a) Inhibition of mRNA expression of target genes in A549-AC cells by gene-specific gRNAs. (b) Inhibition of expression of target proteins in A549-AC cells by gene-specific gRNAs. (c) Increased mRNA expression of target genes in gene-specific overexpression (OE) A549-AC cells. (d) Increased expression of target protein in gene-specific OE A549-AC cells. The comparisons with statistical significance were indicated. \*\*\* $p < 0.001$ ; \*\*\*\* $p < 0.0001$ .

**Extended Data Table 1. List of pro-viral host factors identified from SARS-CoV-2 dropout screens.**

**Extended Data Table 2. List of anti-viral host factors identified from SARS-CoV-2 dropout screens.**

**Extended Data Table 3. Summary of published genome-wide gRNA SARS-CoV-2 screens for integrative studies.** Publicly available datasets from genome-wide CRISPR screens based on the CPE of SARS-CoV-2 on human epithelial cells were extracted and used to evaluate the performance of identified hits. The evaluation criteria for each dataset were listed.

**Extended Data Table 4. Evaluation of 30 identified host factors in two independent validation experiments.**

**Extended Data Table 5. List of DNA sequences to generate gRNAs targeting 30 identified host factors for validation.**

**Extended Data Table 6. List of primer information to determine mRNA expression by real-time PCR.**
